# Supplementary material
Source: publisher figshare collection journal article supplement (https://sage.figshare.com/ndownloader/files/22659335)

## Supplemental Material for **Technical and anatomical considerations for reproducible inactivation of large animal carcasses by steam sterilization**

**Supplementary Figure 1.** Exemplary autoclave load in the case of a calf carcass.

Two stainless steel boxes with the torso in the bottom box and head and limbs in the upper box inside the autoclave chamber.

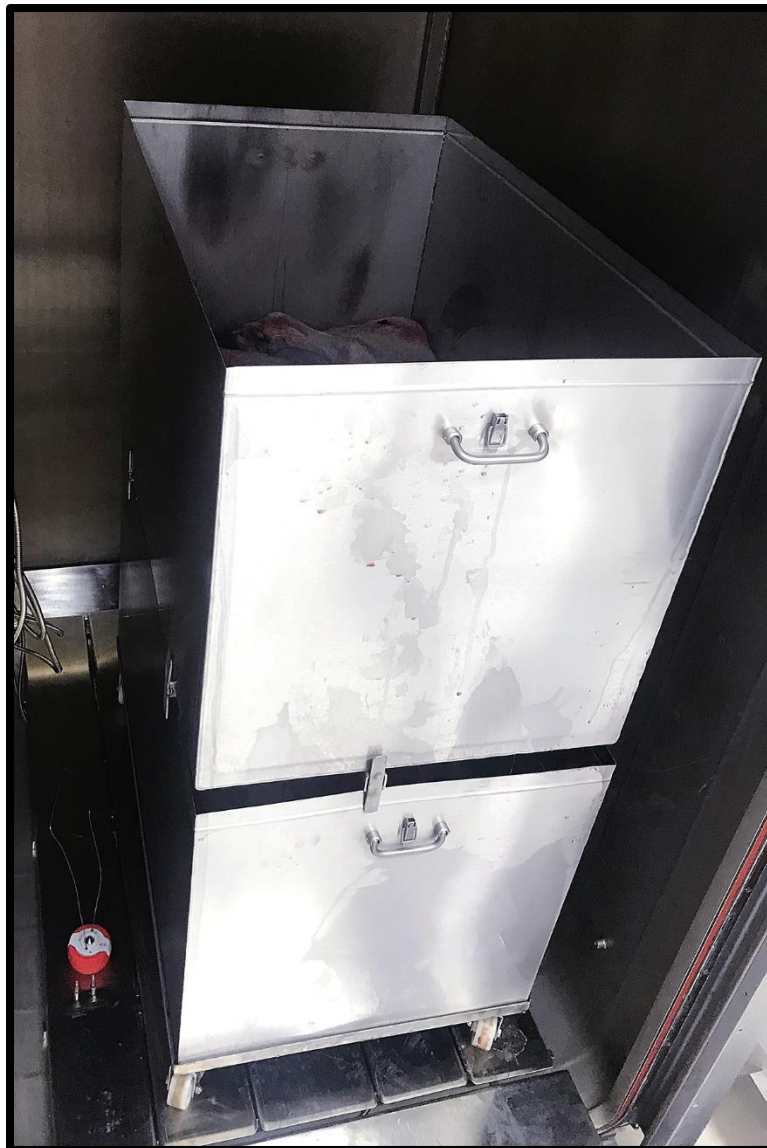

**Supplementary Figure 2.** Temperature graphs at the tissue level during validation run 2 and 3 of pig carcasses.

Complete sterilization cycles and focused data for run 2 (A-D) and run 3 (E-H) with the vacuum phase indicated by an asterisk.

Pig 1

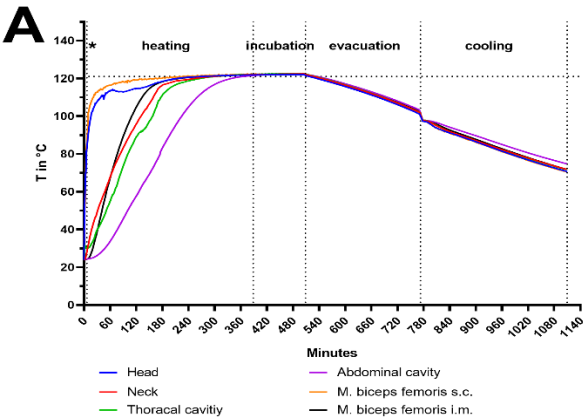

Pig 2

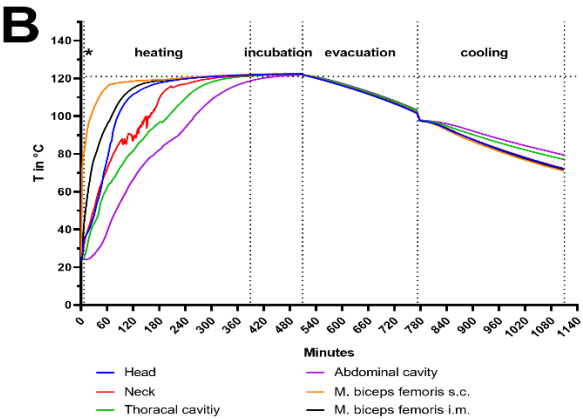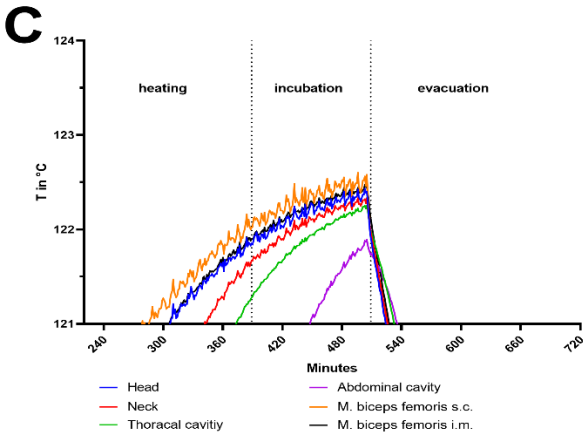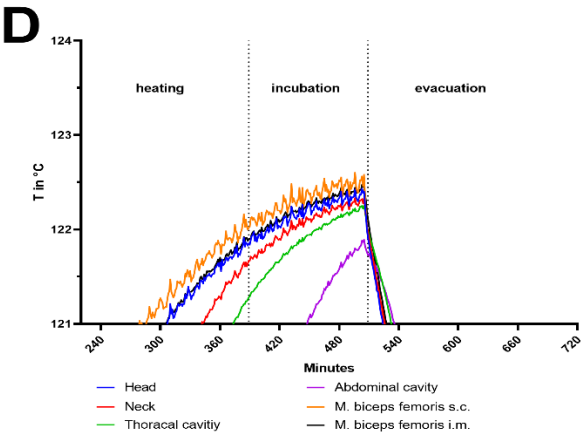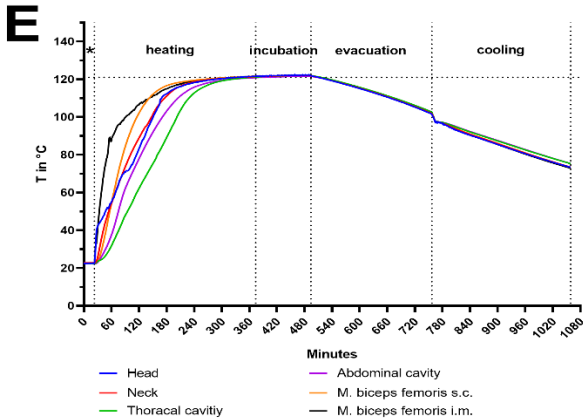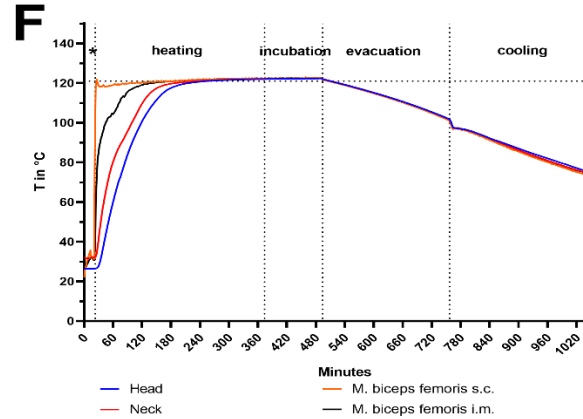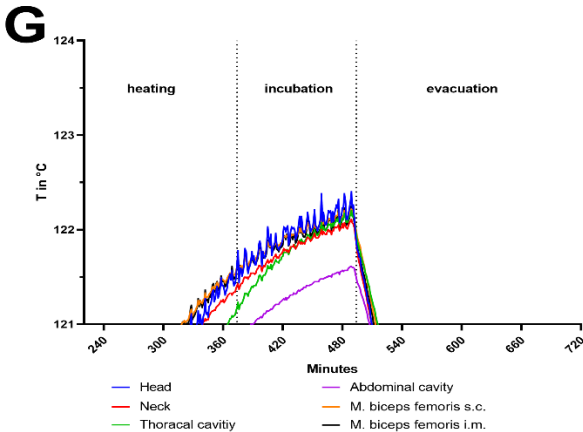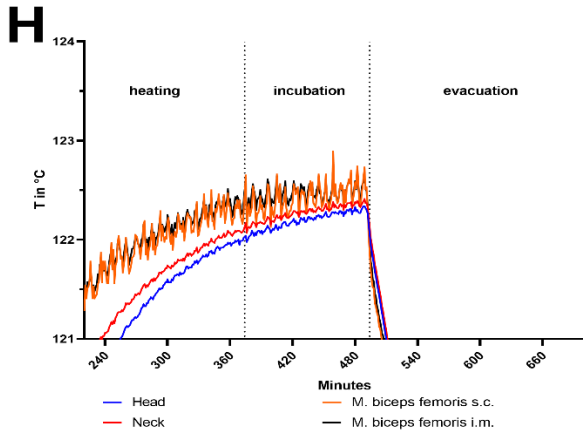

**Supplementary Figure 3.** Temperature graphs at the tissue level during validation run 1 and 2 of calf carcasses.

Complete sterilization cycles and focused data for run 1 (A, B) and 2 (C, D) with the vacuum phase indicated by an asterisk.

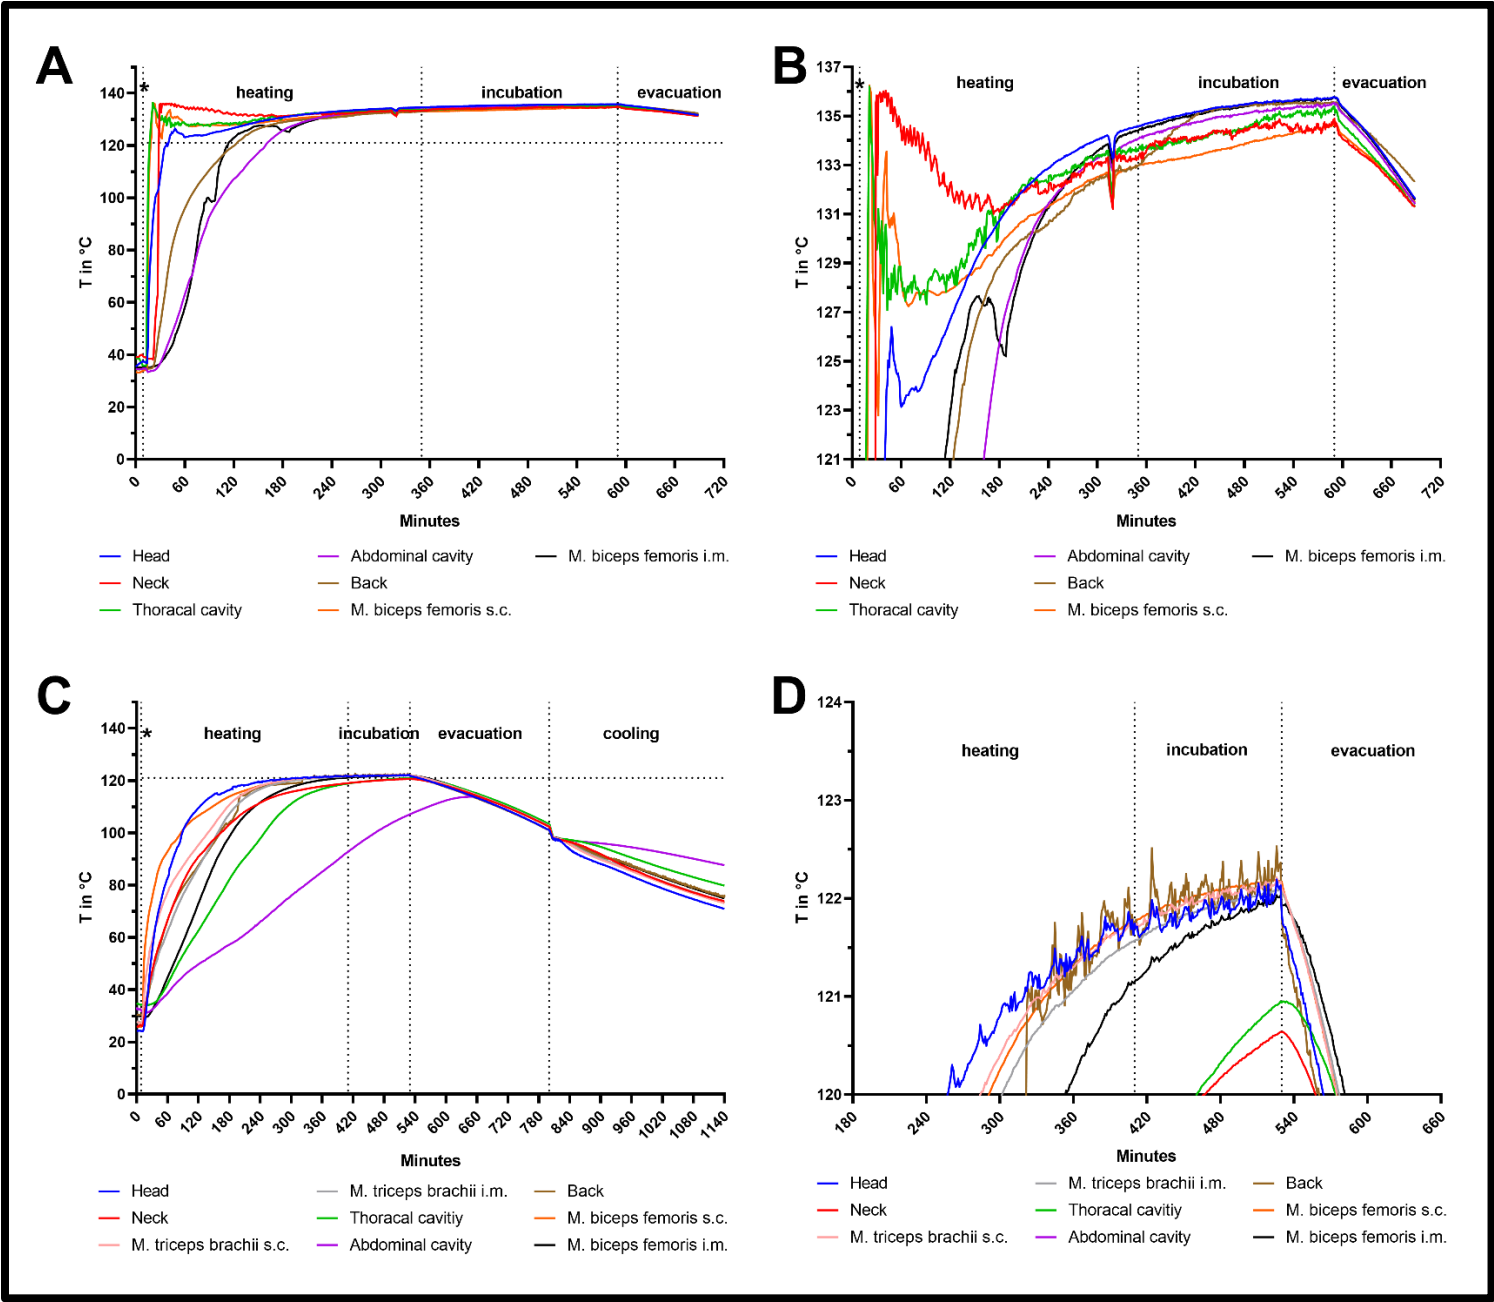

Supplement: Supplementary file 1 [file 22659335]
